# Supplementary material for: Enhancing the toolbox to study IL-17A in cattle and sheep
Source: PubMed Central journal article supplement (PMC5385008; doi:10.1186/s13567-017-0426-5), 2017-04-08
Supplement: 13567_2017_426_MOESM1_ESM.pdf [file 13567_2017_426_MOESM1_ESM.pdf]

|               | Bovine<br>sequence source |                                        | Ovine<br>sequence source |                                        | Caprine<br>sequence source |                                        |
|---------------|---------------------------|----------------------------------------|--------------------------|----------------------------------------|----------------------------|----------------------------------------|
|               | mRNA or cDNA              | Predicted from<br>genome<br>annotation | mRNA or cDNA             | Predicted from<br>genome<br>annotation | mRNA or cDNA               | Predicted from<br>genome<br>annotation |
| IL-17A        | ✓                         |                                        |                          | ✓                                      | ✓                          |                                        |
| IL-17B        |                           | ✓                                      |                          | ✓                                      |                            | ✓                                      |
| IL-17C        |                           | ✓ partial                              |                          | ✓                                      |                            | ✓                                      |
| IL-17D        |                           | ✓                                      |                          |                                        |                            | ✓                                      |
| IL-17E/ IL-25 |                           | ✓                                      | ✓                        |                                        |                            | ✓                                      |
| IL-17F        |                           | ✓                                      |                          | ✓                                      |                            | ✓                                      |
