# Supplementary material for: Enhancing the toolbox to study IL-17A in cattle and sheep
Source: PubMed Central journal article supplement (PMC5385008; doi:10.1186/s13567-017-0426-5), 2017-04-08

A

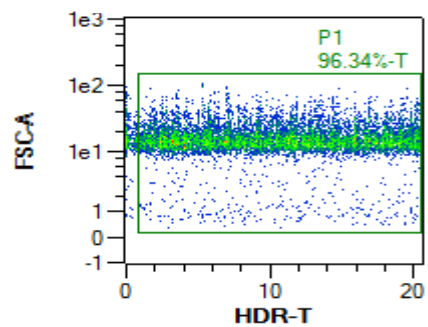

B

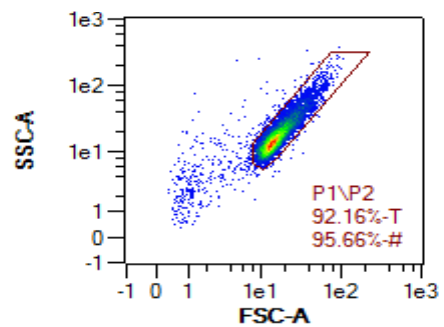

C

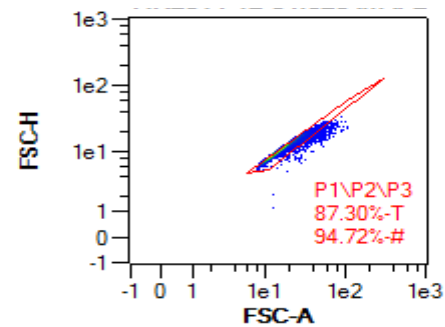

D

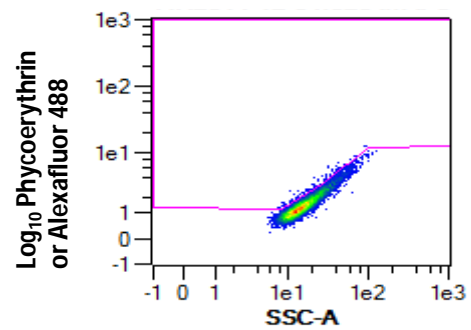

E

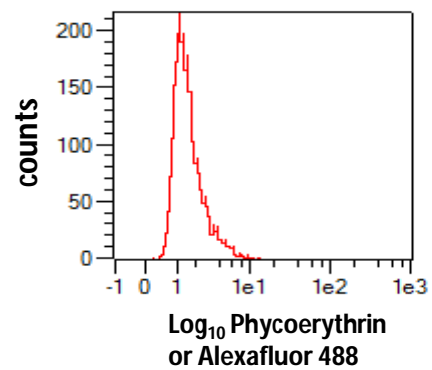

Supplement: 13567_2017_426_MOESM2_ESM.pdf [file 13567_2017_426_MOESM2_ESM.pdf]
