# Supplementary material for: Enhancing the toolbox to study IL-17A in cattle and sheep
Source: PubMed Central journal article supplement (PMC5385008; doi:10.1186/s13567-017-0426-5), 2017-04-08
Supplement: 13567_2017_426_MOESM3_ESM.pdf [file 13567_2017_426_MOESM3_ESM.pdf]

| Primary antibody code | Antibody Clone isotype for mAbs in brackets | Supplier / product code         | Antibody conjugation (where present) | Fluorochrome for detection antibody | CHO UTF |                                  |                                                | Bovine IL-17A |                                  |          | Ovine IL-17A |                                  |          |
|-----------------------|---------------------------------------------|---------------------------------|--------------------------------------|-------------------------------------|---------|----------------------------------|------------------------------------------------|---------------|----------------------------------|----------|--------------|----------------------------------|----------|
|                       |                                             |                                 |                                      |                                     | # %     | Median Fluorescence Region value | Delta Median Fluorescence Intensity (deltaMFI) | # %           | Median Fluorescence Region value | deltaMFI | # %          | Median Fluorescence Region value | deltaMFI |
| (a)                   | N/A (pAb)                                   | Roslin Institute/ N/A           | N/A                                  | AlexaFluor 488                      | 0.67    | 1.23                             | 0                                              | 0.86          | 3.72                             | 0        | 0.66         | 3.52                             | 0        |
| (A)                   | N/A (pAb)                                   | Kingfisher Biotech/ PB0274B-100 | N/A                                  | AlexaFluor 488                      | 96.15   | 3.46                             | 2.23                                           | 99.49         | 17.36                            | 13.64    | 99.86        | 46.62                            | 43.1     |
| (b)                   | VPM21 (IgG1)                                | Moredun/ N/A                    | N/A                                  | R-Phycoerythrin                     | 1.17    | 0.4                              | 0                                              | 0.39          | 1.55                             | 0        | 0.92         | 1.34                             | 0        |
| (B)                   | eBio64Dec17 (IgG1)                          | e-Bioscience/ 12-7179           | R-PE                                 | R-Phycoerythrin                     | 12.54   | 0.51                             | 0.11                                           | 38.74         | 2.58                             | 1.03     | 92.93        | 7.41                             | 6.07     |
| (c)                   | VPM21 (IgG1)                                | Moredun/ N/A                    | N/A                                  | R-Phycoerythrin                     | 0.38    | 0.44                             | 0                                              | 0.46          | 0.99                             | 0        | 0.31         | 1.48                             | 0        |
| (C.1)                 | MT44.6 (IgG1)                               | Mabtech/ 3520-3-250             | N/A                                  | R-Phycoerythrin                     | 0.57    | 0.42                             | 0                                              | 0.51          | 0.99                             | 0        | 0.46         | 1.56                             | 0.08     |
| (C.2)                 | MT241 (IgG1)                                | Mabtech/ 3520M-3-250            | N/A                                  | R-Phycoerythrin                     | 0.38    | 0.43                             | 0                                              | 0.53          | 0.99                             | 0        | 0.36         | 1.55                             | 0.07     |
| (C.3)                 | MT2270                                      | Mabtech/ 3521-14-250            | N/A                                  | R-Phycoerythrin                     | 0.29    | 0.4                              | 0                                              | 0.36          | 0.99                             | 0        | 0.32         | 1.5                              | 0.02     |
| (C.4)                 | MT504 (IgG1)                                | Mabtech/ 3520-5N-500            | Biotin                               | R-Phycoerythrin                     | 0.76    | 0.49                             | 0.05                                           | 61.74         | 2.26                             | 1.27     | 95.96        | 8.2                              | 6.72     |
| (d)                   | VPM21 (IgG1)/ VPM22 (IgG2b)                 | Moredun/ N/A                    | N/A                                  | R-Phycoerythrin                     | 2.55    | 0.61                             | 0                                              | 0.79          | 0.58                             | 0        | 1.37         | 1.17                             | 0        |
| (D.1)                 | 41809 (IgG2b)                               | R & D Systems/ IC317P           | R-PE                                 | R-Phycoerythrin                     | 0.06    | 0.37                             | 0                                              | 17.73         | 0.72                             | 0.14     | 78.58        | 2.33                             | 1.12     |
| (D.2)                 | 41802 (IgG1)                                | R & D Systems/ IC3171P          | R-PE                                 | R-Phycoerythrin                     | 94.14   | 2.45                             | 1.84                                           | 4.07          | 0.69                             | 0.11     | 5.35         | 1.37                             | 0.2      |

Control antibodies are listed in lower case, the anti-IL-17A antibodies are listed in upper case. Using the gating strategy described in brief in evaluation of commercial antibodies subsection (displayed in Additional file 3) the following data are shown: P1/P2/P3/P4 percentage of cells above the region boundary line of phycoerythrin or alexafluor 488 channels vs Side Scatter-Area (denoted #%); P1/P2/P3 median fluorescence region value (phycoerythrin or alexafluor 488 channels); and delta median fluorescence intensity (deltaMFI) calculated by taking the median fluorescence region values (phycoerythrin or alexafluor 488 channels) for the commercial IL-17A antibody and deducting the median fluorescence region value of the appropriate isotype or equivalent control antibody in the same fluorochrome channel) for the CHO UTF, bovIL-17A and ovIL-17A transfected, fixed CHO cells.
