# Supplementary material for: Enhancing the toolbox to study IL-17A in cattle and sheep
Source: PubMed Central journal article supplement (PMC5385008; doi:10.1186/s13567-017-0426-5), 2017-04-08
Supplement: 13567_2017_426_MOESM6_ESM.pdf [file 13567_2017_426_MOESM6_ESM.pdf]

|                         | Koala | Chinese hamster | Common Brown Rat | House Mouse | Naked mole rat | Domestic guinea pig | Pig   | Wild bactrian camel | Goat  | Cow   | Sheep | Chinese tree shrew | Brandts bat | David Myotis Vesper bat | Human | Black flying fox | Horse | Pygmy rabbit | European hare | European rabbit | Brush rabbit | Lesser panda | Dog   | American alligator | Mallard wild duck | Chicken |
|-------------------------|-------|-----------------|------------------|-------------|----------------|---------------------|-------|---------------------|-------|-------|-------|--------------------|-------------|-------------------------|-------|------------------|-------|--------------|---------------|-----------------|--------------|--------------|-------|--------------------|-------------------|---------|
| Koala                   | 100   |                 |                  |             |                |                     |       |                     |       |       |       |                    |             |                         |       |                  |       |              |               |                 |              |              |       |                    |                   |         |
| Chinese hamster         | 54.84 | 100             |                  |             |                |                     |       |                     |       |       |       |                    |             |                         |       |                  |       |              |               |                 |              |              |       |                    |                   |         |
| Common Brown Rat        | 54.03 | 89.52           | 100              |             |                |                     |       |                     |       |       |       |                    |             |                         |       |                  |       |              |               |                 |              |              |       |                    |                   |         |
| House Mouse             | 52.42 | 87.9            | 91.13            | 100         |                |                     |       |                     |       |       |       |                    |             |                         |       |                  |       |              |               |                 |              |              |       |                    |                   |         |
| Naked mole rat          | 58.06 | 72.58           | 66.13            | 67.74       | 100            |                     |       |                     |       |       |       |                    |             |                         |       |                  |       |              |               |                 |              |              |       |                    |                   |         |
| Domestic guinea pig     | 57.26 | 70.97           | 66.94            | 66.94       | 89.52          | 100                 |       |                     |       |       |       |                    |             |                         |       |                  |       |              |               |                 |              |              |       |                    |                   |         |
| Pig                     | 58.06 | 72.58           | 68.55            | 67.74       | 77.42          | 71.77               | 100   |                     |       |       |       |                    |             |                         |       |                  |       |              |               |                 |              |              |       |                    |                   |         |
| Wild bactrian camel     | 57.26 | 73.39           | 69.35            | 71.77       | 76.61          | 74.19               | 83.06 | 100                 |       |       |       |                    |             |                         |       |                  |       |              |               |                 |              |              |       |                    |                   |         |
| Goat                    | 60.48 | 73.39           | 70.16            | 70.97       | 76.61          | 70.97               | 84.68 | 88.71               | 100   |       |       |                    |             |                         |       |                  |       |              |               |                 |              |              |       |                    |                   |         |
| Cow                     | 61.29 | 74.19           | 70.97            | 71.77       | 77.42          | 71.77               | 85.48 | 89.52               | 99.19 | 100   |       |                    |             |                         |       |                  |       |              |               |                 |              |              |       |                    |                   |         |
| Sheep                   | 61.29 | 74.19           | 70.97            | 71.77       | 77.42          | 71.77               | 85.48 | 89.52               | 99.19 | 100   | 100   |                    |             |                         |       |                  |       |              |               |                 |              |              |       |                    |                   |         |
| Chinese tree shrew      | 58.06 | 68.55           | 64.52            | 63.71       | 72.58          | 71.77               | 75.81 | 78.23               | 77.42 | 78.23 | 78.23 | 100                |             |                         |       |                  |       |              |               |                 |              |              |       |                    |                   |         |
| Brandts bat             | 57.26 | 70.97           | 67.74            | 67.74       | 73.39          | 70.16               | 79.03 | 77.42               | 78.23 | 78.23 | 78.23 | 79.84              | 100         |                         |       |                  |       |              |               |                 |              |              |       |                    |                   |         |
| David Myotis Vesper bat | 58.06 | 70.97           | 67.74            | 67.74       | 71.77          | 69.35               | 75.81 | 74.19               | 74.19 | 75    | 75    | 76.61              | 91.13       | 100                     |       |                  |       |              |               |                 |              |              |       |                    |                   |         |
| Human                   | 60.48 | 67.74           | 64.52            | 64.52       | 74.19          | 70.16               | 76.61 | 78.23               | 75.81 | 76.61 | 76.61 | 78.23              | 79.84       | 77.42                   | 100   |                  |       |              |               |                 |              |              |       |                    |                   |         |
| Black flying fox        | 57.26 | 75              | 70.16            | 70.16       | 72.58          | 70.16               | 79.03 | 79.84               | 77.42 | 78.23 | 78.23 | 77.42              | 83.06       | 81.45                   | 80.65 | 100              |       |              |               |                 |              |              |       |                    |                   |         |
| Horse                   | 57.26 | 77.42           | 71.77            | 71.77       | 76.61          | 73.39               | 75.81 | 80.65               | 81.45 | 82.26 | 82.26 | 79.84              | 79.84       | 79.84                   | 78.23 | 83.06            | 100   |              |               |                 |              |              |       |                    |                   |         |
| Pygmy rabbit            | 61.29 | 73.39           | 71.77            | 69.35       | 72.58          | 71.77               | 75.81 | 81.45               | 82.26 | 83.06 | 83.06 | 79.03              | 77.42       | 76.61                   | 79.84 | 83.87            | 85.48 | 100          |               |                 |              |              |       |                    |                   |         |
| European hare           | 60.48 | 71.77           | 70.16            | 67.74       | 72.58          | 72.58               | 75    | 79.84               | 81.45 | 82.26 | 82.26 | 80.65              | 78.23       | 77.42                   | 80.65 | 79.84            | 82.26 | 95.16        | 100           |                 |              |              |       |                    |                   |         |
| European rabbit         | 59.68 | 73.39           | 70.97            | 69.35       | 75             | 74.19               | 76.61 | 81.45               | 81.45 | 82.26 | 82.26 | 81.45              | 79.84       | 78.23                   | 82.26 | 82.26            | 84.68 | 95.97        | 97.58         | 100             |              |              |       |                    |                   |         |
| Brush rabbit            | 60.48 | 73.39           | 71.77            | 69.35       | 75             | 74.19               | 76.61 | 82.26               | 83.06 | 83.87 | 83.87 | 81.45              | 79.03       | 78.23                   | 81.45 | 81.45            | 83.87 | 96.77        | 96.77         | 97.58           | 100          |              |       |                    |                   |         |
| Lesser panda            | 54.84 | 72.58           | 68.55            | 69.35       | 74.19          | 70.16               | 78.23 | 82.26               | 81.45 | 82.26 | 82.26 | 81.45              | 79.03       | 76.61                   | 78.23 | 82.26            | 84.68 | 85.48        | 83.87         | 56.29           | 85.48        | 100          |       |                    |                   |         |
| Dog                     | 54.84 | 73.39           | 69.35            | 69.35       | 75             | 70.97               | 78.23 | 82.26               | 82.26 | 83.06 | 83.06 | 81.45              | 81.45       | 79.03                   | 81.45 | 85.48            | 86.29 | 87.9         | 86.29         | 88.71           | 87.9         | 93.55        | 100   |                    |                   |         |
| American alligator      | 44.35 | 44.35           | 43.55            | 43.55       | 42.74          | 43.55               | 44.35 | 45.16               | 41.94 | 42.74 | 42.74 | 47.58              | 46.77       | 48.39                   | 50    | 47.58            | 49.19 | 46.77        | 47.58         | 48.39           | 47.58        | 46.77        | 47.58 | 100                |                   |         |
| Mallard wild duck       | 45.16 | 45.97           | 41.94            | 41.13       | 47.58          | 50.81               | 49.19 | 50.81               | 48.39 | 49.19 | 49.19 | 49.19              | 50          | 51.61                   | 47.58 | 47.58            | 45.16 | 47.58        | 49.19         | 49.19           | 49.19        | 45.16        | 47.58 | 57.26              | 100               |         |
| Chicken                 | 46.77 | 45.16           | 42.74            | 41.94       | 46.77          | 49.19               | 50    | 50.81               | 47.58 | 48.39 | 48.39 | 48.39              | 49.19       | 51.61                   | 47.58 | 46.77            | 44.35 | 46.77        | 48.39         | 48.39           | 48.39        | 44.35        | 46.77 | 55.65              | 87.9              | 100     |

BovIL-17-A and ovIL-17A cDNAs encoding the mature proteins were aligned with the corresponding sequences from a variety of vertebrates including representative mammal, reptile and avian species and the protein pair-wise identity matrix was derived using Clustal 2.1.
