# Supplementary material for: Enhancing the toolbox to study IL-17A in cattle and sheep
Source: Springer Nature journal article supplement (doi:10.1186/s13567-017-0426-5), 2017-04-08

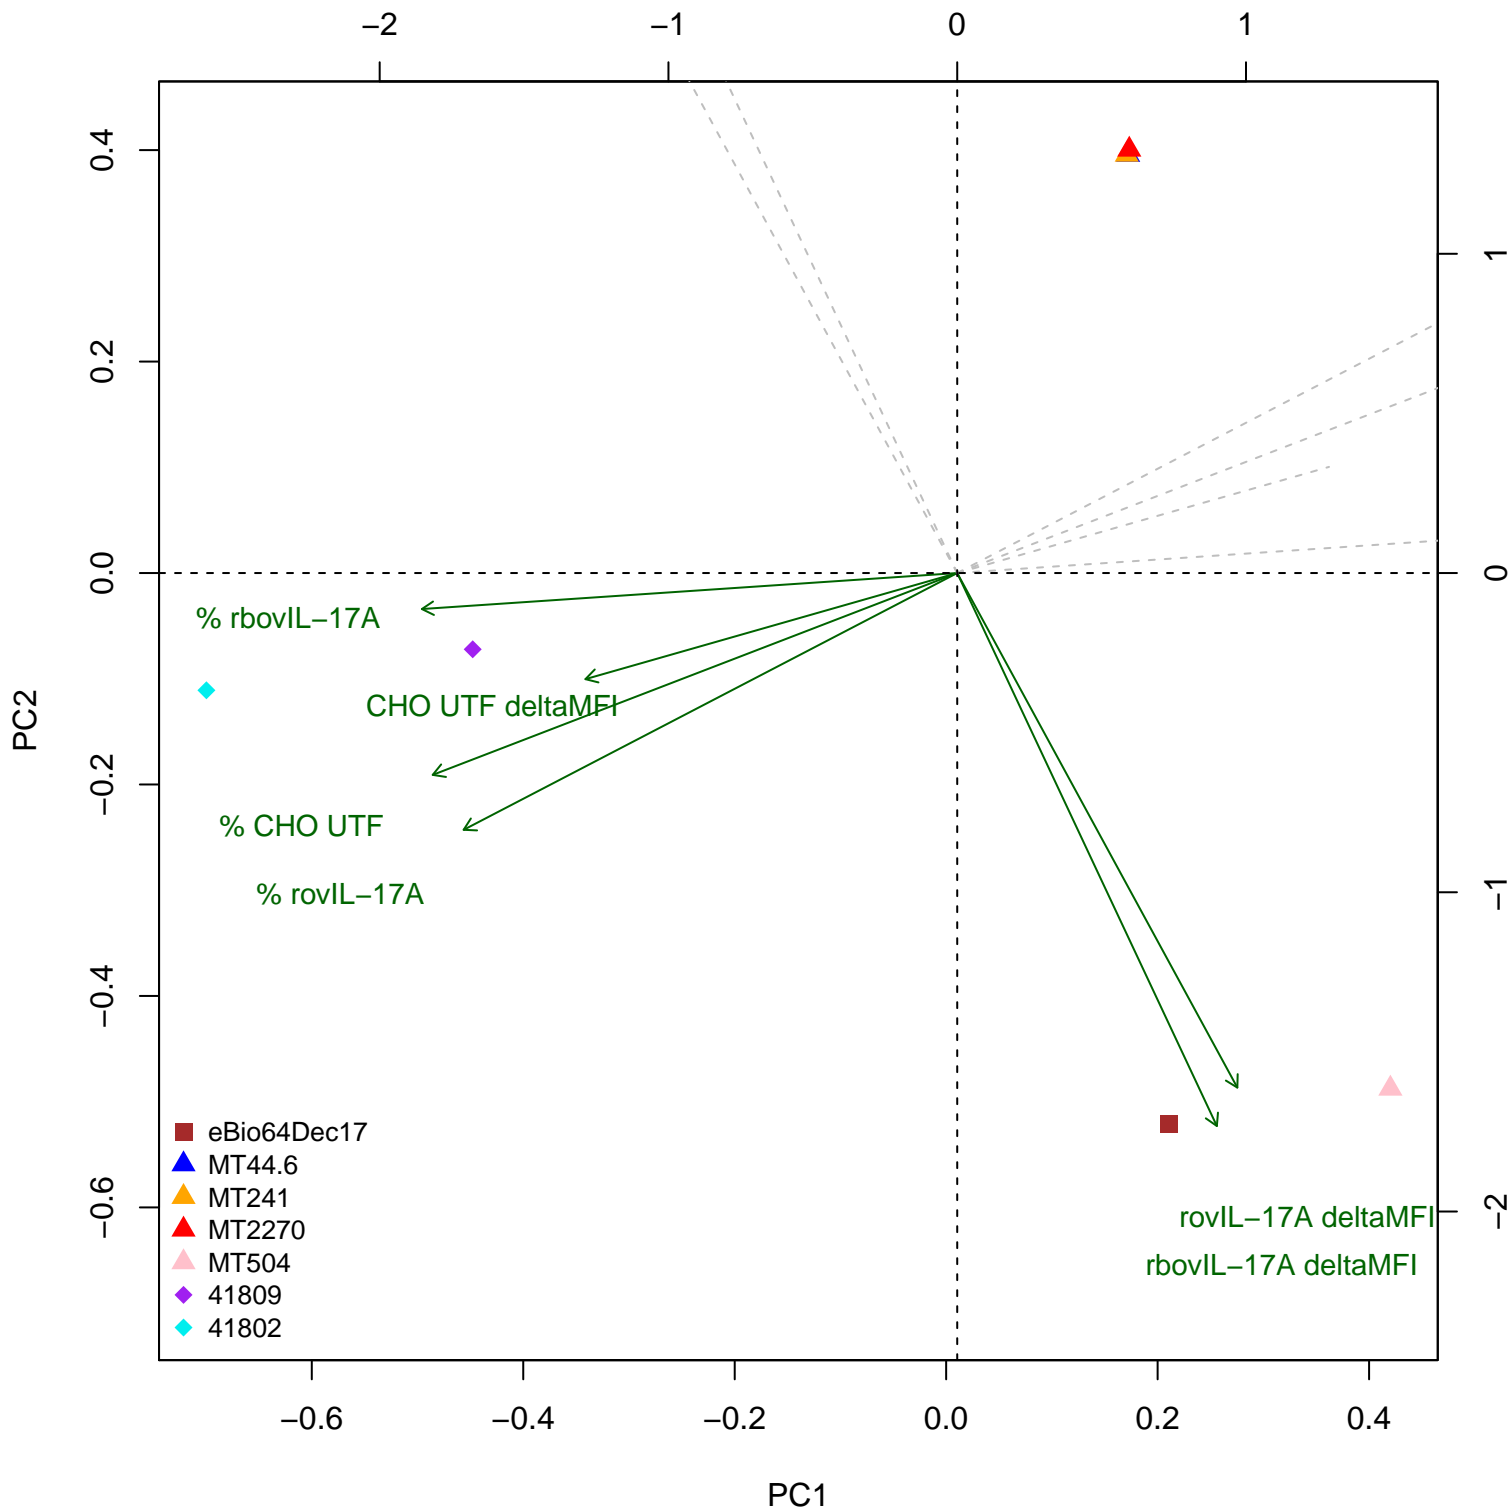

Supplement: MOESM7 [file 13567_2017_426_MOESM7_ESM.pdf]
